# Supplementary material for: The Circulating Protease Persephone Is an Immune Sensor for Microbial Proteolytic Activities Upstream of the Drosophila Toll Pathway
Source: PubMed Central journal article supplement — Mol Cell. 2018 Feb 15;69(4):539–550.e6. doi: 10.1016/j.molcel.2018.01.029 (PMC5823974; doi:10.1016/j.molcel.2018.01.029), 2018-02-15
Supplement: mmc1.pdf [file mmc1.pdf]

**Molecular Cell, Volume 69**

**Supplemental Information**

**The Circulating Protease Persephone Is  
an Immune Sensor for Microbial Proteolytic  
Activities Upstream of the *Drosophila* Toll Pathway**

**Najwa Issa, Nina Guillaumot, Emilie Lauret, Nicolas Matt, Christine Schaeffer-Reiss, Alain Van Dorsselaer, Jean-Marc Reichhart, and Florian Veillard**

# Figures S1 to S5

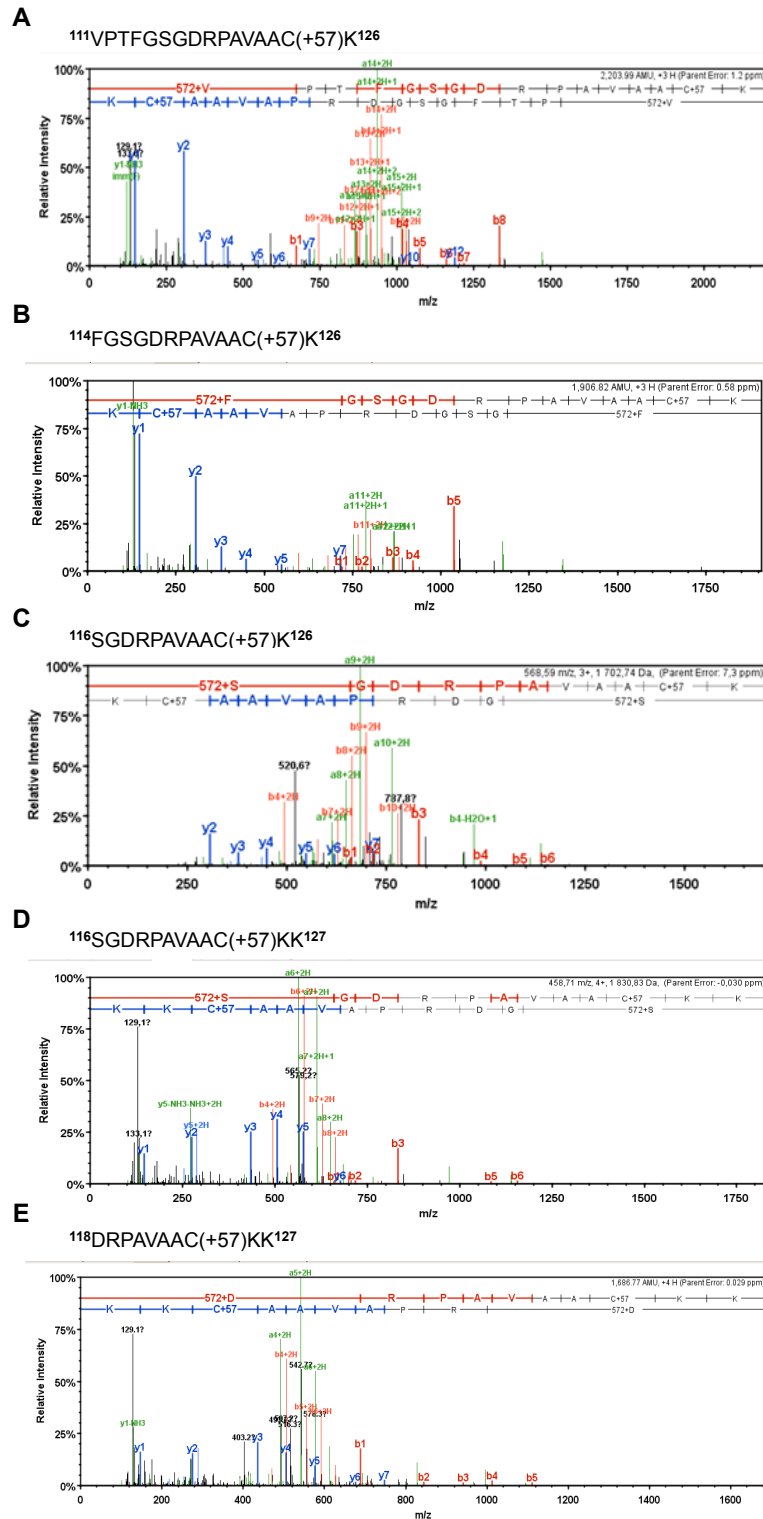

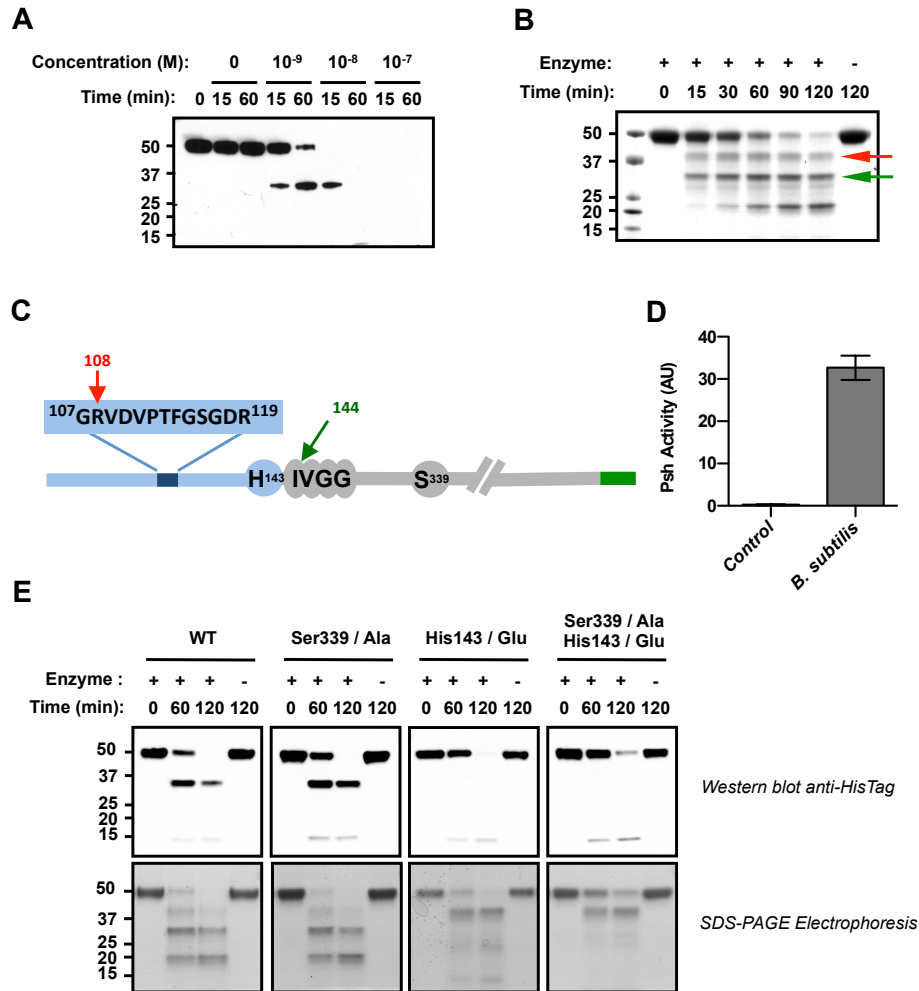

**Figure S2: Specific activation of Psh by *B. subtilis* subtilisin (Related to Figure 3)**

(A) rpro-Psh (0.2  $\mu\text{g}/\mu\text{l}$ ) was incubated at 29 °C with various concentrations of *B. subtilis* purified subtilisin. After 15 or 60 min, 1  $\mu\text{g}$  aliquots were removed and boiled for 5 min to stop the reaction. After SDS-PAGE electrophoresis, residual rpro-Psh was visualized using anti-HisTag antibody. (B) rpro-Psh (0.2  $\mu\text{g}/\mu\text{l}$ ) was incubated at 29 °C with *B. subtilis* (1 nM) purified protease. At various time points, 5  $\mu\text{g}$  aliquots were removed and boiled for 5 min to stop the reaction. Samples were then electrophoresed and stained with Coomassie blue. Representative results of at least 2 independent experiments. (C) The N-terminal extremities of the main hydrolysis products (indicated by arrows) were determined by nanoLC-MS/MS analysis after in-gel protein N-terminal labeling using TMPP-Ac-Osu. (D) Cell-free supernatant of S2 cells expressing rpro-Psh (200  $\mu\text{l}$ ) was incubated in TrisHCl buffer 0.1 M, pH 8 with *B. subtilis* (1 nM) protease. After 1 hour, proteolytic activity of the generated rPro-Psh hydrolysis products was determined on the fluorogenic substrate Z-Arg-AMC for 30 min at 29 °C in 0.1 M TrisHCl buffer pH 8 supplemented with 5 mM CaCl<sub>2</sub>. (E) rpro-Psh mutants His143/Glu, Ser339/Ala and His143/Glu; Ser339/Ala (0.2  $\mu\text{g}/\mu\text{l}$ ) were incubated with *B. subtilis* protease under the same conditions. After 1 or 2 hours, residual proteins were observed by Western blot with anti-6HisTag antibody and hydrolysis products visualized by Coomassie blue staining.

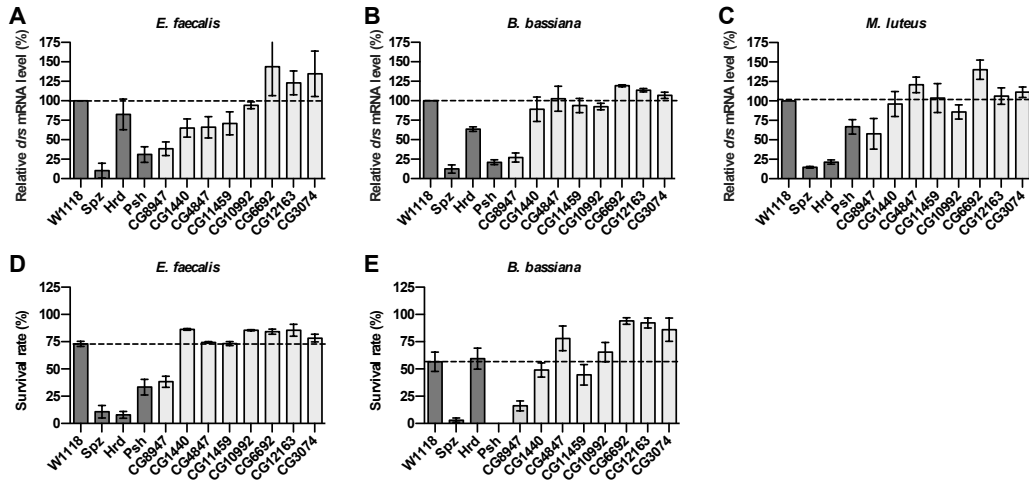

**Figure S3: Implication of cysteine cathepsins in the Toll pathway (Related to Figure 5)**

(A-C) Flies deficient for the indicated gene (See Sup Table 1) were challenged by septic injury with *E. faecalis* (OD<sub>600</sub>=1) (A), *M. luteus* (OD<sub>600</sub>>200) (C) or by natural infection with *B. bassiana* (B). After 24 hours at 29 °C, flies were collected and *drs* gene expression was monitored by RT-qPCR in total RNA extracts. *Ribosomal protein 49 (Rp49)* mRNA was used as reference gene. Results were normalized to the value obtained for *w<sup>1118</sup>* control flies. Data represent means ± standard errors of 3 independent experiments, each containing three groups of 10 flies (5 males and 5 females). (D-E) Survival rate of adult flies challenged with *E. faecalis* by septic injury (OD<sub>600</sub>=1) or with *B. bassiana* by natural infection 72 hours post-infection. Results are normalized with control flies (*w<sup>1118</sup>* flies for null mutants and *C564-gal4* flies for RNAi expressing flies). Data represent means ± standard errors of 3 independent experiments, each containing three groups of 20 flies (10 males and 10 females).

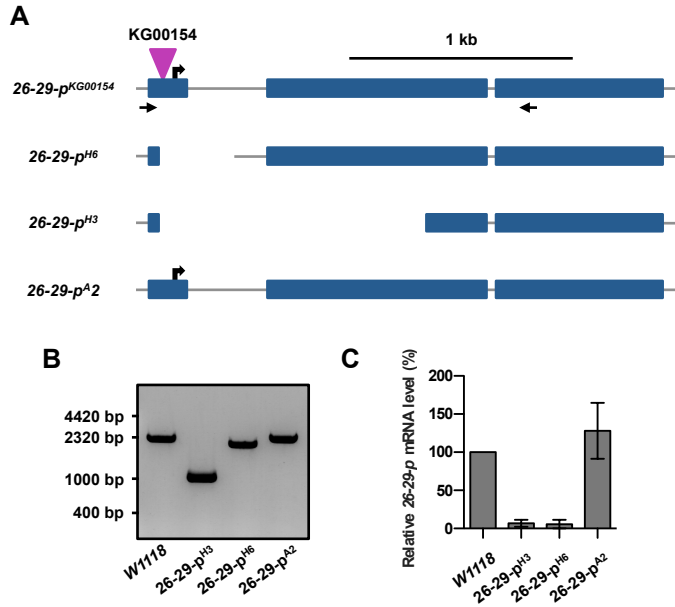

**Figure S4: Generation of cathepsin 26-29-p mutants (Related to Figure 6)**

(A) Schematic representation of the genomic region of *26-29-p* and the mutant alleles obtained by P-element excision. Two null mutants and one revertant fly lines were generated by excision of the *KG00154* P-element (purple arrow) following crosses with *P(Δ2-3)* transposase flies (Bloomington #2534). (B) PCR products obtained using the primers forward: 5'-GTCCGACTATCGGTTCGGTTT-3' and reverse: 5'-GATTGCCGCCATTCTTCAGG-3' and indicated by black arrows in (A). (C) Flies were collected and *26-29-p* gene expression was monitored by RT-qPCR in total RNA extracts. *Ribosomal protein 49 (Rp49)* mRNA was used for normalization. Data represent means ± standard errors of 3 independent experiments, each containing three groups of 10 flies (5 males and 5 females).

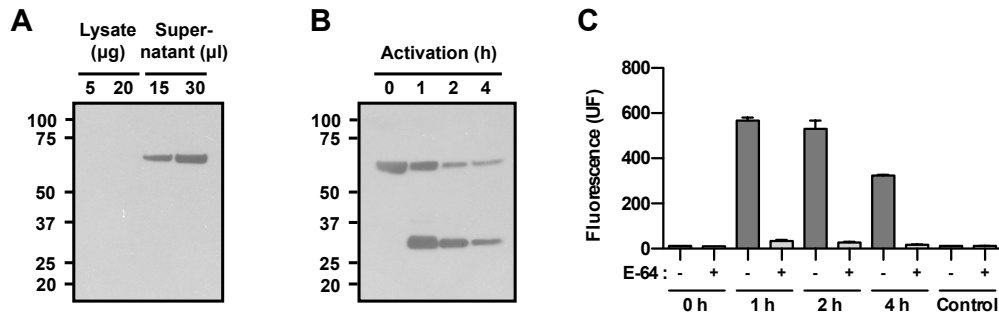

**Figure S5: Expression and activation of rpro-cathepsin 26-29-p (Related to Figure 7)**

S2 cells were stably transfected with the expression plasmid of rpro-cathepsin 26-29-p as described previously. (A) Expression of rpro-cathepsin 26-29-p was assessed in S2 cells lysate and cells culture supernatant by Western blot using the monoclonal Anti-6His C-term antibody. (B) To activate rpro-cathepsin 26-29-p, cells culture media was concentrated 20 times and then incubated with pepsine (0.002 mg/ml) in 0.2 M Glycine buffer, pH 4. After incubation at 37 °C, rpro-cathepsin 26-29-p processing was followed by Western blot with the monoclonal Anti-6His C-term antibody. (C) Activity of the generated hydrolysis products was assessed with or without E-64 (0.1 mM) at 37 °C in 0.1 M sodium acetate buffer, pH 5.5 on the fluorogenic substrate Z-Phe-Arg-AMC ( $\lambda_{\text{ex}} = 350 \text{ nm}$ ;  $\lambda_{\text{em}} = 460 \text{ nm}$ ). Pepsine alone was used as control.

## Supplementary Table S1 TO S5

**Table S1: List of Plasmids (Related to STAR Methods)**

| Plasmid name | Construction                               | Destination plasmid | Details                                                                                   |
|--------------|--------------------------------------------|---------------------|-------------------------------------------------------------------------------------------|
| pJM1345      | rpro-Psh                                   | pMT-V5              | PCR on cDNA clone GH12385 (DGRC) with primers IMU839/840 cloned in KpnI-XhoI              |
| pJM1681      | rpro-Psh <sup>M1</sup>                     | pMT-V5              | PCR on pJM1345 with primers IMU1144/1342, IMU1341/1145, IMU1144/1145 cloned in BglII-XhoI |
| pJM1682      | rpro-Psh <sup>M2</sup>                     | pMT-V5              | PCR on pJM1345 with primers IMU 1343/1344 cloned in Bgl2-XhoI                             |
| pJM1692      | pro-Psh                                    | pUAST-ATTB          | KpnI-PmeI fragment from pJM1345                                                           |
| pJM1693      | pro-Psh <sup>M1</sup>                      | pUAST-ATTB          | KpnI-PmeI from fragment pJM1681                                                           |
| pJM1694      | pro-Psh <sup>M2</sup>                      | pUAST-ATTB          | KpnI-PmeI fragment from pJM1682                                                           |
| pJM1674      | rpro-Psh<br>Ser339 / Ala                   | pMT-V5              | PCR on pJM1345 with primers IMU1144/1228, IMU1145/1229, IMU1144/1145 cloned in KpnI-XhoI  |
| pJM1675      | rpro-Psh<br>His144 / Glu                   | pMT-V5              | PCR on pJM1345 with primers IMU1144/1338, IMU1145/1337, IMU1144/1145 cloned in KpnI-XhoI  |
| pJM1676      | rpro-Psh<br>His143 / Glu ;<br>Ser339 / Ala | pMT-V5              | PCR on pJM674 with primers IMU1144/1338, IMU1145/1337, IMU1144/1145 cloned in KpnI-XhoI   |
| pJM1696      | rpro-cathepsin<br>26-29-p                  | pMT-V5              | PCR on cDNA clone pRE 18380 (DGRC) with primers T7/IMU1347 cloned in EcoR1-Apa1           |

**Table S2: List of Primers for PCR (Related to STAR Methods)**

| Primer name | Sequence (5'-3')                                   |
|-------------|----------------------------------------------------|
| IMU 839     | GGGGGGTACCAAGATGCCATTGAAGTGGTCCCTGC                |
| IMU 840     | GGGGCTCGAGCACCCGATTGTCCGGCCAGA                     |
| IMU 1144    | TGTGGTCAGCAGCAAAATCAAGTG                           |
| IMU 1145    | CTGCATTCTAGTTGTGGTTTGTCC                           |
| IMU 1228    | GCTCATGAATGAGCGGCCACCGCGTGCCTTGCATGCGTCGGCG        |
| IMU 1229    | CGCCGACGCATGCAAGGGCGACGCCGGTGGGCCGCTCATTTCATGAGC   |
| IMU 1337    | GAGCGGCAATCAATTGGTCATAGACATCGTGGGCGTTATCC          |
| IMU 1338    | GGATAACCGCCACGATGTCTATGACCAATTGATTGCCGCTC          |
| IMU 1341    | GCTGCTGCTGCTGCTCCCACGTTCCGAAGCGGT                  |
| IMU 1342    | AGCAGCAGCAGCAGCACTGGTCATTGGAGCTTTTGTGC             |
| IMU 1343    | GCTGCTGCTGCTGCTGCTGCTGCTGCTAGCGGTGATCGCCCAGC       |
| IMU 1344    | AGCAGCAGCAGCAGCAGCAGCAGCAGCACTGGTCATTGGAGCTTTTGTGC |
| IMU 1345    | GCACAAAAGCTCCAATGACCAGTAGCGGTGATCGCCCAGC           |
| IMU 1346    | GCTGGGCGATCACCGCTACTGGTCATTGGAGCTTTTGTGC           |
| IMU 1347    | GCTTACCTTCGAAGGGCCCATCTCCACATAAGTGGGCATGG          |
| T7          | TGTA AACGACGGCCAGTGA                               |



**Table S3: Screening of cysteine cathepsins (Related to STAR Methods)**

| Name                   | CG number | Bloomington stock number | Genotype                             |
|------------------------|-----------|--------------------------|--------------------------------------|
| 26-29-p                | CG8947    | 13051                    | P(SUPor-P)26-29-p <sup>KG00154</sup> |
| Cathepsin L1           | CG6692    | 32932                    | P(TRIP.HMS00725)attP2                |
| CG4847                 | CG4847    | 42655                    | P(TRIP.HMS02491)attP2                |
| CG12163                | CG12163   | 33955                    | P(TRIP.HMS00910)attP2                |
| CG11459                | CG11459   | 50488                    | Mi(MIC)CG11459 <sup>MI08810</sup>    |
| Cathepsin B1           | CG10992   | 15434                    | P(EPgy2)CtsB1 <sup>EY03339</sup>     |
| Swing                  | CG3074    | 36591                    | P(TRIP.GL00551)attP2                 |
| Bleomycin<br>Hydrolase | CG1440    | 13977                    | P(SUPor-P)CG1440 <sup>KG04580</sup>  |

**Table S4: Ms/Ms fragmentation table of the N-terminal TMPP labeled peptide IVGGYPVDPGVYPHMAAIGYITFGTDFR (Mascot interpretation, Related to Figure 3).**

| amino acid | b ion | a (M)     | a* (M)   | a** (M)   | a++ (M)  | a0 (M)    | a0++ (M) | b (M)     | b++ (M)  | b0 (M)   | b0++ (M) | y (M)     | y* (M)   | y** (M)  | y++ (M)   | y0 (M)   | y0++ (M) | y ion |
|------------|-------|-----------|----------|-----------|----------|-----------|----------|-----------|----------|----------|----------|-----------|----------|----------|-----------|----------|----------|-------|
| I          | 1     | 658.2776  | 641,251  | 321,1291  | 329,6424 | 640,267   | 320,6371 | 686.2725  | 343,6399 |          |          |           |          |          |           |          |          | 28    |
| V          | 2     | 757.346   | 740,3194 | 370,6634  | 379,1766 | 739,3354  | 370,1713 | 785.3409  | 393,1741 |          |          | 2916,403  | 2899,376 | 1450,192 | 1458,705  | 2898,392 | 1449,7   | 27    |
| G          | 3     | 814,3674  | 797,3409 | 399,1741  | 407,6874 | 796,3569  | 398,6821 | 842,3624  | 421,6848 |          |          | 2817,334  | 2800,308 | 1400,657 | 1409,171  | 2799,324 | 1400,165 | 26    |
| G          | 4     | 871.3889  | 854,3624 | 427,6848  | 436,1981 | 853,3783  | 427,1928 | 899.3838  | 450,1955 |          |          | 2760,313  | 2743,286 | 1372,147 | 1380,66   | 2742,302 | 1371,655 | 25    |
| Y          | 5     | 1034.4522 | 1017,426 | 509,2165  | 517,7298 | 1016,442  | 508,7245 | 1062.4471 | 531,7272 |          |          | 2703,291  | 2686,265 | 1343,636 | 1352,149  | 2685,281 | 1343,144 | 24    |
| P          | 6     | 1131.505  | 1114,478 | 557,7429  | 566,2561 | 1113,494  | 557,2509 | 1159,5    | 580,2536 |          |          | 2540,228  | 2523,201 | 1262,104 | 1270,618  | 2522,217 | 1261,612 | 23    |
| V          | 7     | 1230.5734 | 1213,547 | 607,2771  | 615,7903 | 1212,563  | 606,7851 | 1258.5683 | 629,7878 |          |          | 2443,175  | 2426,149 | 1213,578 | 1222,091  | 2425,165 | 1213,086 | 22    |
| D          | 8     | 1345.6    | 1328,574 | 664,7905  | 673,3038 | 1327,59   | 664,2985 | 1373.5953 | 687.3013 | 1355,585 | 678,296  | 2344,107  | 2327,08  | 1164,044 | 1172,557  | 2326,096 | 1163,552 | 21    |
| P          | 9     | 1442.653  | 1425,627 | 713,3169  | 721,8302 | 1424,643  | 712,8249 | 1470,648  | 735,8277 | 1452,638 | 726,8224 | 2229.0797 | 2212,053 | 1106,53  | 1115.0435 | 2211,069 | 1106,038 | 20    |
| G          | 10    | 1499.675  | 1482,648 | 741,8277  | 750,3409 | 1481,664  | 741,3356 | 1527.6695 | 764,3384 | 1509,659 | 755,3331 | 2132.027  | 2115     | 1058,004 | 1066,517  | 2114,016 | 1057,512 | 19    |
| V          | 11    | 1598.743  | 1581,716 | 791,3619  | 799,8751 | 1580,732  | 790,8699 | 1626.7379 | 813,8726 | 1608,727 | 804,8673 | 2075,006  | 2057,979 | 1029,493 | 1038,006  | 2056,995 | 1029,001 | 18    |
| Y          | 12    | 1761.806  | 1744,78  | 872,8935  | 881,4068 | 1743,796  | 872,4015 | 1789.8012 | 895,4043 | 1771,791 | 886,399  | 1975.9371 | 1958,911 | 979,9589 | 988.4722  | 1957,927 | 979,4669 | 17    |
| P          | 13    | 1858.859  | 1841,833 | 921,4199  | 929,9332 | 1840,849  | 920,9279 | 1886.854  | 943,9306 | 1868,843 | 934,9254 | 1812.8738 | 1795,847 | 898,4272 | 906,9405  | 1794,863 | 897,9352 | 16    |
| H          | 14    | 1995.918  | 1978,891 | 989,9494  | 998,4626 | 1977,907  | 989,4574 | 2023,913  | 1012,46  | 2005,902 | 1003,455 | 1715,821  | 1698,795 | 849,9009 | 858,4141  | 1697,81  | 849,4089 | 15    |
| M          | 15    | 2142.953  | 2125,927 | 1063.4671 | 1071,98  | 2124,943  | 1062,975 | 2170,948  | 1085,978 | 2152,938 | 1076,973 | 1578.7621 | 1561,736 | 781,3714 | 789,8847  | 1560,752 | 780,8794 | 14    |
| A          | 16    | 2213.991  | 2196,964 | 1098,986  | 1107,499 | 2195.9799 | 1098,494 | 2241.9854 | 1121,496 | 2223,975 | 1112,491 | 1431.7267 | 1414,7   | 707,8537 | 716,367   | 1413,716 | 707,3617 | 13    |
| A          | 17    | 2285.028  | 2268,001 | 1134,504  | 1143,018 | 2267,017  | 1134,012 | 2313,023  | 1157,015 | 2295,012 | 1148,01  | 1360.6896 | 1343,663 | 672,3352 | 680,8484  | 1342,679 | 671,8431 | 12    |
| I          | 18    | 2398.112  | 2381,085 | 1191,046  | 1199,56  | 2380,101  | 1190,554 | 2426,107  | 1213,557 | 2408,096 | 1204,552 | 1289.6525 | 1272,626 | 636,8166 | 645,3299  | 1271,642 | 636,3246 | 11    |
| G          | 19    | 2455.133  | 2438,107 | 1219,557  | 1228,07  | 2437,123  | 1219,065 | 2483,128  | 1242,068 | 2465,118 | 1233,062 | 1176.5684 | 1159,542 | 580,2746 | 588,7878  | 1158,558 | 579,7826 | 10    |
| Y          | 20    | 2618.197  | 2601,17  | 1301,089  | 1309,602 | 2600,186  | 1300,597 | 2646,191  | 1323,599 | 2628,181 | 1314,594 | 1119.5469 | 1102,52  | 551,7638 | 560,2771  | 1101,536 | 551,2718 | 9     |
| I          | 21    | 2731.281  | 2714,254 | 1357,631  | 1366,144 | 2713,27   | 1357,139 | 2759,276  | 1380,141 | 2741,265 | 1371,136 | 956.4836  | 939,4571 | 470,2322 | 478,7454  | 938,473  | 469,7402 | 8     |
| T          | 22    | 2832.328  | 2815,302 | 1408,155  | 1416,668 | 2814,318  | 1407,663 | 2860,323  | 1430,665 | 2842,313 | 1421,66  | 843.3995  | 826,373  | 413,6901 | 422,2034  | 825.389  | 413,1981 | 7     |
| F          | 23    | 2979.397  | 2962,37  | 1481,689  | 1490,202 | 2961,386  | 1481,197 | 3007,392  | 1504,199 | 2989,381 | 1495,194 | 742.3519  | 725,3253 | 363,1663 | 371,6796  | 724,3413 | 362,6743 | 6     |
| G          | 24    | 3036.418  | 3019,392 | 1510,199  | 1518,713 | 3018,408  | 1509,707 | 3064,413  | 1532,71  | 3046,403 | 1523,705 | 595.2835  | 578,2569 | 289,6321 | 298,1454  | 577,2729 | 289,1401 | 5     |
| T          | 25    | 3137.466  | 3120,439 | 1560,723  | 1569,237 | 3119,455  | 1560,231 | 3165,461  | 1583,234 | 3147,45  | 1574,229 | 538.262   | 521,2354 | 261,1214 | 269,6346  | 520,2514 | 260,6293 | 4     |
| D          | 26    | 3252.493  | 3235,466 | 1618,237  | 1626.75  | 3234,482  | 1617,745 | 3280,488  | 1640,748 | 3262,477 | 1631,742 | 437.2143  | 420,1878 | 210,5975 | 219,1108  | 419,2037 | 210,1055 | 3     |
| F          | 27    | 3399.561  | 3382,535 | 1691,771  | 1700,284 | 3381,551  | 1691,279 | 3427,556  | 1714,282 | 3409,546 | 1705,276 | 322.1874  | 305.1608 | 153,084  | 161,5973  |          |          | 2     |
| R          | 28    |           |          |           |          |           |          |           |          |          |          | 175.119   | 158,0924 | 79,5498  | 88,0631   |          |          | 1     |

**Table S5: Log-rank analyses of flies survival assays (OASIS online application) (Related to Figure 6)**

| Condition                                                    | <i>B. bassiana</i> |         |                    | <i>E. faecalis</i> |         |                    |
|--------------------------------------------------------------|--------------------|---------|--------------------|--------------------|---------|--------------------|
|                                                              | Chi <sup>2</sup>   | P-value | Bonferroni P-value | Chi <sup>2</sup>   | P-value | Bonferroni P-value |
| <i>w</i> <sup>1118</sup> v.s. <i>Psh</i>                     | 78.36              | 0.0e+00 | 0.0e+00            | 16.63              | 4.5e-05 | 0.0002             |
| <i>w</i> <sup>1118</sup> v.s. <i>Spz</i>                     | 79.56              | 0.0e+00 | 0.0e+00            | 62.94              | 0.0e+00 | 0.0e+00            |
| <i>w</i> <sup>1118</sup> v.s. <b>26-29-p<sup>H3</sup></b>    | 84.16              | 0.0e+00 | 0.0e+00            | 14.72              | 0.0001  | 0.0006             |
| <i>w</i> <sup>1118</sup> v.s. <b>26-29-p<sup>H6</sup></b>    | 67.11              | 0.0e+00 | 0.0e+00            | 9.70               | 0.0018  | 0.0092             |
| <i>w</i> <sup>1118</sup> v.s. <b>26-29-p<sup>A2</sup></b>    | 1.83               | 0.1758  | 0.8792             | 0.00               | 0.9505  | 1.0000             |
|                                                              |                    |         |                    |                    |         |                    |
| <i>Psh</i> v.s. <i>w</i> <sup>1118</sup>                     | 78.36              | 0.0e+00 | 0.0e+00            | 16.63              | 4.5e-05 | 0.0002             |
| <i>Psh</i> v.s. <i>Spz</i>                                   | 5.32               | 0.0211  | 0.1056             | 32.07              | 1.5e-08 | 7.5e-08            |
| <i>Psh</i> v.s. <b>26-29-p<sup>H3</sup></b>                  | 2.52               | 0.1122  | 0.5610             | 0.01               | 0.9195  | 1.0000             |
| <i>Psh</i> v.s. <b>26-29-p<sup>H6</sup></b>                  | 2.34               | 0.1261  | 0.6304             | 0.65               | 0.4214  | 1.0000             |
| <i>Psh</i> v.s. <b>26-29-p<sup>A2</sup></b>                  | 49.70              | 0.0e+00 | 0.0e+00            | 17.63              | 2.7e-05 | 0.0001             |
|                                                              |                    |         |                    |                    |         |                    |
| <i>Spz</i> v.s. <i>w</i> <sup>1118</sup>                     | 79.56              | 0.0e+00 | 0.0e+00            | 62.94              | 0.0e+00 | 0.0e+00            |
| <i>Spz</i> v.s. <i>Psh</i>                                   | 5.32               | 0.0211  | 0.1056             | 32.07              | 1.5e-08 | 7.5e-08            |
| <i>Spz</i> v.s. <b>26-29-p<sup>H3</sup></b>                  | 0.18               | 0.6751  | 1.0000             | 24.51              | 7.4e-07 | 3.7e-06            |
| <i>Spz</i> v.s. <b>26-29-p<sup>H6</sup></b>                  | 8.90               | 0.0028  | 0.0142             | 29.92              | 4.5e-08 | 2.3e-07            |
| <i>Spz</i> v.s. <b>26-29-p<sup>A2</sup></b>                  | 54.91              | 0.0e+00 | 0.0e+00            | 66.53              | 0.0e+00 | 0.0e+00            |
|                                                              |                    |         |                    |                    |         |                    |
| <b>26-29-p<sup>H3</sup></b> v.s. <i>w</i> <sup>1118</sup>    | 84.16              | 0.0e+00 | 0.0e+00            | 14.72              | 0.0001  | 0.0006             |
| <b>26-29-p<sup>H3</sup></b> v.s. <i>Psh</i>                  | 2.52               | 0.1122  | 0.5610             | 0.01               | 0.9195  | 1.0000             |
| <b>26-29-p<sup>H3</sup></b> v.s. <i>Spz</i>                  | 0.18               | 0.6751  | 1.0000             | 24.51              | 7.4e-07 | 3.7e-06            |
| <b>26-29-p<sup>H3</sup></b> v.s. <b>26-29-p<sup>H6</sup></b> | 6.96               | 0.0083  | 0.0416             | 0.61               | 0.4351  | 1.0000             |
| <b>26-29-p<sup>H3</sup></b> v.s. <b>26-29-p<sup>A2</sup></b> | 55.06              | 0.0e+00 | 0.0e+00            | 15.56              | 0.0001  | 0.0004             |
|                                                              |                    |         |                    |                    |         |                    |
| <b>26-29-p<sup>H6</sup></b> v.s. <i>w</i> <sup>1118</sup>    | 67.11              | 0.0e+00 | 0.0e+00            | 9.70               | 0.0018  | 0.0092             |
| <b>26-29-p<sup>H6</sup></b> v.s. <i>Psh</i>                  | 2.34               | 0.1261  | 0.6304             | 0.65               | 0.4214  | 1.0000             |
| <b>26-29-p<sup>H6</sup></b> v.s. <i>Spz</i>                  | 8.90               | 0.0028  | 0.0142             | 29.92              | 4.5e-08 | 2.3e-07            |
| <b>26-29-p<sup>H6</sup></b> v.s. <b>26-29-p<sup>H3</sup></b> | 6.96               | 0.0083  | 0.0416             | 0.61               | 0.4351  | 1.0000             |
| <b>26-29-p<sup>H6</sup></b> v.s. <b>26-29-p<sup>A2</sup></b> | 39.74              | 0.0e+00 | 0.0e+00            | 10.51              | 0.0012  | 0.0059             |
|                                                              |                    |         |                    |                    |         |                    |
| <b>26-29-p<sup>A2</sup></b> v.s. <i>w</i> <sup>1118</sup>    | 1.83               | 0.1758  | 0.8792             | 0.00               | 0.9505  | 1.0000             |
| <b>26-29-p<sup>A2</sup></b> v.s. <i>Psh</i>                  | 49.70              | 0.0e+00 | 0.0e+00            | 17.63              | 2.7e-05 | 0.0001             |
| <b>26-29-p<sup>A2</sup></b> v.s. <i>Spz</i>                  | 54.91              | 0.0e+00 | 0.0e+00            | 66.53              | 0.0e+00 | 0.0e+00            |
| <b>26-29-p<sup>A2</sup></b> v.s. <b>26-29-p<sup>H3</sup></b> | 55.06              | 0.0e+00 | 0.0e+00            | 15.56              | 0.0001  | 0.0004             |
| <b>26-29-p<sup>A2</sup></b> v.s. <b>26-29-p<sup>H6</sup></b> | 39.74              | 0.0e+00 | 0.0e+00            | 10.51              | 0.0012  | 0.0059             |
